# Supplementary material for: The Use of Physician-Patient Email: A Follow-up Examination of Adoption and Best-Practice Adherence 2005-2008
Source: J Med Internet Res. 2011 Feb 25;13(1):e23. doi: 10.2196/jmir.1578 (PMC3221345; doi:10.2196/jmir.1578)
Supplement: Supplementary file 1 [file jmir_v13i1e23_app1.pdf]

# Use of Information Technology by Physicians

## 1. Do you have internet access at your current office practice location?

☐ **YES** If **YES**, please answer the following:

**What type of internet access do you have?** (Please ✓ all that apply)

☐ Dial-up ☐ Wireless ☐ High Speed (i.e. cable or DSL)

☐ **NO**

## 2. How satisfied are you with the level of computerization in your current office practice?

☐ Very Satisfied ☐ Somewhat Satisfied ☐ Neutral ☐ Somewhat Dissatisfied ☐ Very Dissatisfied

## 3. Overall, how sophisticated of a computer user do you consider yourself?

☐ Very Sophisticated ☐ Sophisticated ☐ Neutral ☐ Unsophisticated ☐ Very Unsophisticated

## 4. Does your current office practice use Electronic Health Records (EHR)?

EHR is defined as a paperless form of the medical record that requires the provider to enter patient information (i.e., clinical notes) into a computer system instead of doing so on paper.

☐ **YES** If **YES**, please answer the following:

What YEAR best describes when you began using EHR in your practice? \_\_\_\_\_

☐ **NO** If **NO**, please answer the following:

**Are you considering getting EHR?** (Please ✓ one)

☐ **YES**, very soon (within 1 year)  
☐ **YES**, but not within the next year  
☐ **NO**, I am not considering getting EHR at this time

## 5. If you personally routinely use Electronic Health Records (EHR) in your office practice, which of the following functions does your EHR include? (Please ✓ all that apply)

|                                                                        |                                                               |
|------------------------------------------------------------------------|---------------------------------------------------------------|
| <input type="checkbox"/> Problem list                                  | <input type="checkbox"/> Patient scheduling                   |
| <input type="checkbox"/> Procedures                                    | <input type="checkbox"/> Weight-based dosing calculations     |
| <input type="checkbox"/> Diagnoses                                     | <input type="checkbox"/> Growth charting                      |
| <input type="checkbox"/> Medication list                               | <input type="checkbox"/> Clinical decision support            |
| <input type="checkbox"/> Allergies                                     | <input type="checkbox"/> Patient education materials          |
| <input type="checkbox"/> Patient demographics (i.e., age, DOB, etc.)   | <input type="checkbox"/> Coding advice to physicians          |
| <input type="checkbox"/> Clinical notes                                | <input type="checkbox"/> Advance directives                   |
| <input type="checkbox"/> Electronic prescribing of medications         | <input type="checkbox"/> Access to reference material         |
| <input type="checkbox"/> Electronic order entry (i.e., labs or x-rays) | <input type="checkbox"/> Preventive service reminders         |
| <input type="checkbox"/> Electronically available lab data/ results    | <input type="checkbox"/> Auto-updated insurance coverage info |
| <input type="checkbox"/> Electronically available x-ray results        | <input type="checkbox"/> Offsite access/ log-in capability    |
| <input type="checkbox"/> Electronic connection to pharmacy info        | <input type="checkbox"/> Other (Specify): _____               |

**6. Please indicate how each potential barrier affects your decision to continue (or expand) using EHR. If you do not currently use EHR, please respond by indicating how much each barrier contributes to why you don't currently use EHR in your office practice.**

|                                                                                                   | POTENTIAL BARRIERS       |                          |                          |                          |
|---------------------------------------------------------------------------------------------------|--------------------------|--------------------------|--------------------------|--------------------------|
|                                                                                                   | Major Barrier            | Minor Barrier            | Not a Barrier            | Not Applicable           |
| <b><u>Productivity</u></b>                                                                        |                          |                          |                          |                          |
| • Lack of time to acquire, implement such a system                                                | <input type="checkbox"/> | <input type="checkbox"/> | <input type="checkbox"/> | <input type="checkbox"/> |
| • Entering data into computer can be cumbersome                                                   | <input type="checkbox"/> | <input type="checkbox"/> | <input type="checkbox"/> | <input type="checkbox"/> |
| • No time to learn how to use such a system                                                       | <input type="checkbox"/> | <input type="checkbox"/> | <input type="checkbox"/> | <input type="checkbox"/> |
| • The system would be difficult to use                                                            | <input type="checkbox"/> | <input type="checkbox"/> | <input type="checkbox"/> | <input type="checkbox"/> |
| • EHR may slow me down                                                                            | <input type="checkbox"/> | <input type="checkbox"/> | <input type="checkbox"/> | <input type="checkbox"/> |
| • Disrupts workflow and/or office's physical layout to accommodate going to a computerized system | <input type="checkbox"/> | <input type="checkbox"/> | <input type="checkbox"/> | <input type="checkbox"/> |
| • Temporary loss of productivity and/or revenue during EHR system implementation phase            | <input type="checkbox"/> | <input type="checkbox"/> | <input type="checkbox"/> | <input type="checkbox"/> |
| <b><u>Financial</u></b>                                                                           |                          |                          |                          |                          |
| • Inadequate Return on Investment (ROI)                                                           | <input type="checkbox"/> | <input type="checkbox"/> | <input type="checkbox"/> | <input type="checkbox"/> |
| • Upfront cost of hardware/software are too high                                                  | <input type="checkbox"/> | <input type="checkbox"/> | <input type="checkbox"/> | <input type="checkbox"/> |
| • Ongoing maintenance costs would be too high                                                     | <input type="checkbox"/> | <input type="checkbox"/> | <input type="checkbox"/> | <input type="checkbox"/> |
| <b><u>Technical</u></b>                                                                           |                          |                          |                          |                          |
| • Lack of uniform data standards within the industry                                              | <input type="checkbox"/> | <input type="checkbox"/> | <input type="checkbox"/> | <input type="checkbox"/> |
| • Products available do not meet my needs                                                         | <input type="checkbox"/> | <input type="checkbox"/> | <input type="checkbox"/> | <input type="checkbox"/> |
| • Me and/or my staff don't have any technical knowledge                                           | <input type="checkbox"/> | <input type="checkbox"/> | <input type="checkbox"/> | <input type="checkbox"/> |
| • Temporary loss of access to patient records if computer crashes or power fails                  | <input type="checkbox"/> | <input type="checkbox"/> | <input type="checkbox"/> | <input type="checkbox"/> |
| <b><u>Patients</u></b>                                                                            |                          |                          |                          |                          |
| • Privacy/confidentiality concerns (i.e., electronic records not secure)                          | <input type="checkbox"/> | <input type="checkbox"/> | <input type="checkbox"/> | <input type="checkbox"/> |
| • Patient resistance/ not wanting their physicians to use EHR                                     | <input type="checkbox"/> | <input type="checkbox"/> | <input type="checkbox"/> | <input type="checkbox"/> |

**7. Does your current office practice use electronic prescribing?**

E-prescribing is defined as use of an electronic system that enables physicians to send prescriptions and refill authorizations to any electronically enabled pharmacy's computer and also receive refill authorizations requests from the pharmacy

☐ **YES** If **YES**, please answer the following:

What **YEAR** best describes when you began using E-prescribing in your practice? \_\_\_\_\_

What percentage of **NEW** prescriptions do you E-prescribe currently? \_\_\_\_\_%

What percentage of **REFILL** authorizations do you E-prescribe currently? \_\_\_\_\_%

What functions are included in your E-prescribing system? (Please ✓ all that apply)

- |                                                                                        |                                                                                                        |
|----------------------------------------------------------------------------------------|--------------------------------------------------------------------------------------------------------|
| <input type="checkbox"/> Drug list you previously prescribed for patient               | <input type="checkbox"/> Patient insurance coverage eligibility look-up (through e-prescribing system) |
| <input type="checkbox"/> Drug list that others have prescribed for patient             | <input type="checkbox"/> Intelligent decision support tools (e.g., severe drug interaction alerts)     |
| <input type="checkbox"/> Formulary coverage look-up (through the e-prescribing system) |                                                                                                        |

☐ **NO** Are you considering electronic prescribing? (Please ✓ one)

- ☐ **YES**, very soon (within 1 year)  
☐ **YES**, but not within the next year  
☐ **NO**, I am not considering getting E-prescribing at this time

8. Do you personally use email from your office practice to communicate with patients?

☐ **YES** If **YES**, please answer the following:

**How often do you email patients?**

☐ Often (at least once on ½ of all business days) ☐ Occasionally ☐ Rarely

**Which of the following policies, if any, do you require for e-mail with your patients?**

- ☐ Establish a turnaround time for messages
- ☐ Inform patients about privacy issues with respect to e-mail
- ☐ Print e-mail communications and place in patient's chart
- ☐ Establish types of transactions (i.e., prescription refill, appointment scheduling, etc.)
- ☐ Instruct patients to put category of transaction in subject line of message
- ☐ Request patients put their name or identification number in body of message
- ☐ Configure automatic reply to acknowledge receipt of patient's message
- ☐ Send a new message to inform patient of completion of request
- ☐ Request patients use auto-reply feature to acknowledge reading clinician's message
- ☐ Develop archival and retrieval mechanisms
- ☐ Explain to patients that their message should be concise
- ☐ Remind patients when they do not adhere to guidelines
- ☐ When e-mail messages become too lengthy, notify patients to come in to discuss or call them

☐ **NO I DON'T personally use email with patients.** Please answer the following:

**Would you like to communicate with your patients by email in the future?**

- ☐ Yes
- ☐ No
- ☐ Don't Know yet

9. Other than patients, do you use email from your practice with any other groups?

☐ **YES** If **YES**, please answer the following:

**Which of the following groups do you use email with? (Please ✓ all that apply)**

- ☐ Family member or caregiver of patients
- ☐ Other doctors
- ☐ Business related communications (e.g., with insurers, pharmacies, etc.)
- ☐ Hospitals
- ☐ Pharmaceutical companies
- ☐ My personal friends or family members
- ☐ Other (please specify): \_\_\_\_\_

☐ **NO**

## DEMOGRAPHIC INFORMATION

**10. Which of the following best describes the area in which you currently spend the majority of your practice time?** (Please select only **one** choice)

- |                                            |                                                                  |
|--------------------------------------------|------------------------------------------------------------------|
| <input type="checkbox"/> Family Medicine   | <input type="checkbox"/> Surgical Specialty (Specify) _____      |
| <input type="checkbox"/> Internal Medicine | <input type="checkbox"/> Medical Specialty (Specify) _____       |
| <input type="checkbox"/> Pediatrics        | <input type="checkbox"/> Pediatric Sub-specialty (Specify) _____ |
| <input type="checkbox"/> OB/GYN            | <input type="checkbox"/> Other (Specify) _____                   |
| <input type="checkbox"/> General Surgery   |                                                                  |

**11. Estimate the percent of your practice that is made up of patients in the following age groups:**

0-18 years \_\_\_\_\_ %

19-64 years \_\_\_\_\_ %

65 years and over \_\_\_\_\_ %

**12. Approximately what percentages of your patients have the following insurance coverage?**

Medicare \_\_\_\_\_ %

Self-pay \_\_\_\_\_ %

Medicaid \_\_\_\_\_ %

Uninsured \_\_\_\_\_ %

Private insurance \_\_\_\_\_ %

**13. How many physicians, including yourself, work at the practice location where you spend the majority of your time?**

\_\_\_\_\_ # of physicians

**14. Which single setting best describes where the majority of your time is spent?**

- |                                                                                   |                                                                     |
|-----------------------------------------------------------------------------------|---------------------------------------------------------------------|
| <input type="checkbox"/> Single specialty private practice                        | <input type="checkbox"/> Group or staff model HMO                   |
| <input type="checkbox"/> Multi specialty private practice                         | <input type="checkbox"/> Academic health center/ university setting |
| <input type="checkbox"/> Hospital or Emerg. Dept. (hospital employee)             | <input type="checkbox"/> Community health center                    |
| <input type="checkbox"/> Hospital-owned office-based practice (hospital employee) | <input type="checkbox"/> County health department                   |
|                                                                                   | <input type="checkbox"/> Other (Specify) _____                      |

**15. How long have you practiced . . .**

In your current community? \_\_\_\_\_ YEARS

Total years in practice (since medical school graduation) \_\_\_\_\_ YEARS

**16. What is your gender?** ☐ Male ☐ Female

**17. What is your Age:** ☐ Less than 40 years ☐ 41-50 years ☐ 51-60 years ☐ 61 years or greater

**18. ☐ Yes, I would like to receive a summary of the findings. Email:** \_\_\_\_\_

**Thank you for your help!!!**

Please return survey in the pre-addressed, postage-paid envelope to:  
FSU Survey Research Laboratory Tallahassee, Florida 32306-2221
